# Supplementary material
Source: PubMed Central journal article supplement (PMC2773297)
Supplement: NIHMS76346-supplement-Supp_Summ.pdf [file NIHMS76346-supplement-Supp_Summ.pdf]

## Minimum Information about a Flow Cytometry Experiment MIFlowCyt

# Summary of Required Information

*Josef Spidlen, Ryan R. Brinkman  
Terry Fox Laboratory, British Columbia Cancer Research Centre  
675 West 10th Avenue, Vancouver, BC, Canada*

### Document Status

This is an informative reference providing a summary of the Minimum Information about a Flow Cytometry Experiment (MIFlowCyt) Recommendation version 1.0 as adopted by the International Society for Analytical Cytology (ISAC) in February 2008. This document is not a normative standard. The normative MIFlowCyt Recommendation can be downloaded from <http://www.isac-net.org/>.

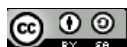

The work may be used under the terms of the *Creative Commons Attribution-ShareAlike 3.0 Unported* license. You are free to share (copy, distribute and transmit), and adapt the work under the conditions specified at <http://creativecommons.org/licenses/by-sa/3.0/legalcode>.

### Acknowledgement:

MIFlowCyt development has been supported by NIH grant EB005034 from the National Institute of Biomedical Imaging And Bioengineering and by the NIAID Bioinformatics Integration Support Contract AI40076 (BISC). The content is solely the responsibility of the authors and does not necessarily represent the official views of the National Institute of Biomedical Imaging And Bioengineering or the National Institutes of Health.

## Mandatory Information

Below is the summary of required information required by the Minimum Information about a Flow Cytometry Experiment (MIFlowCyt). Numbering in this document corresponds to numbering within the MIFlowCyt Recommendation document. Please note that the information listed in this summary may not be sufficient for certain experiment descriptions. Refer to MIFlowCyt Recommendation for further details.

### 1. Experiment Overview

- 1.1. Purpose
- 1.2. Keywords
- 1.3. Experiment Variables
- 1.4. Organization
  - 1.4.1. Name
  - 1.4.2. Address
- 1.5. Primary Contact
  - 1.5.1. Name
  - 1.5.2. Email Address
- 1.6. Date
- 1.8. Quality Control Measures

### 2. Flow Sample/Specimen Details

#### 2.1. Sample/Specimen Material Description

*Based on sample type, 2.1.1, 2.1.2, or 2.1.3 is required*

##### 2.1.1. Biological Samples

- 2.1.1.1. Biological Sample Description
- 2.1.1.2. Biological Sample Source Description
- 2.1.1.3. Biological Sample Source Organism Description
  - 2.1.1.3.1. Taxonomy
  - 2.1.1.3.4. Phenotype
  - 2.1.1.3.5. Genotype
  - 2.1.1.3.6. Treatment

##### 2.1.2. Environmental Samples

- 2.1.2.1. Environmental Sample Description
- 2.1.2.2. Environmental Sample Location

##### 2.1.3. Other Samples

- 2.1.3.1. Other Sample Description

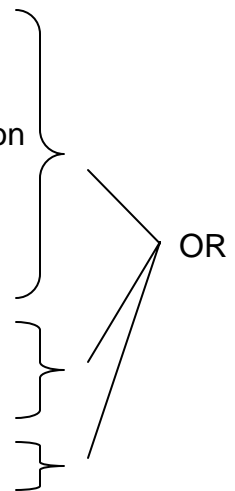

- 2.3. Sample Treatment(s) Description
- 2.4. Fluorescence Reagent(s) Description
  - 2.4.2. Analyte
  - 2.4.3. Analyte Detector
  - 2.4.4. Analyte Reporter (Fluorochrome)
  - 2.4.6. Reagent Manufacturer Name
  - 2.4.7. Reagent Catalogue Number

### 3. Instrument Details

- 3.1. Instrument Manufacturer
- 3.2. Instrument Model
- 3.3. Instrument Configuration and Settings

- 3.3.4. Optical Filters

- The following shall be provided unless filters are original, in which case the manufacturing date of the instrument may be sufficient*

- 3.3.4.3. Optical Filter Installation Date
    - 3.3.4.4. Optical Filter Manufacturer
    - 3.3.4.5. Optical Filter Model Number
  - 3.3.5. Optical Detectors
    - 3.3.5.3. Optical Detector Voltage (*unless not adjustable*)

### 4. Data Analysis Details (*if data analysis has been done*)

- 4.1. List-mode Data File
- 4.2. Compensation Details
  - 4.2.1. Compensation Description
- 4.3. Data Transformation Details
  - 4.3.1. Purpose of Data Transformation
  - 4.3.2. Data Transformation Description
- 4.4. Gating (Data Filtering) Details
  - 4.4.1. Gate Description
  - 4.4.2. Gate Statistics
  - 4.4.3. Gate Boundaries (*or images or detailed gate membership information*)
